# Supplementary material for: Double-bond delocalization in non-alternant hydrocarbons induces inverted singlet–triplet gaps
Source: Royal Society of Chemistry journal article supplement (doi:10.1039/d3sc03409g), 2023-01-01
Supplement: d3sc03409g1.pdf [file d3sc03409g1.pdf]

# Electronic Supplementary Information for: Double-bond delocalization in non-alternant hydrocarbons induces inverted singlet-triplet gaps

Marc H. Garner<sup>‡,\*</sup>, J. Terence Blaskovits<sup>‡</sup>, and Clémence Corminboeuf\*

*Laboratory for Computational Molecular Design, Institute of Chemical Sciences and  
Engineering, Ecole Polytechnique federale de Lausanne (EPFL), 1015 Lausanne,  
Switzerland.*

<sup>‡</sup>*These authors contributed equally to this work.*

E-mail: marc.garner@epfl.ch; clemence.corminboeuf@epfl.ch

## Additional figures

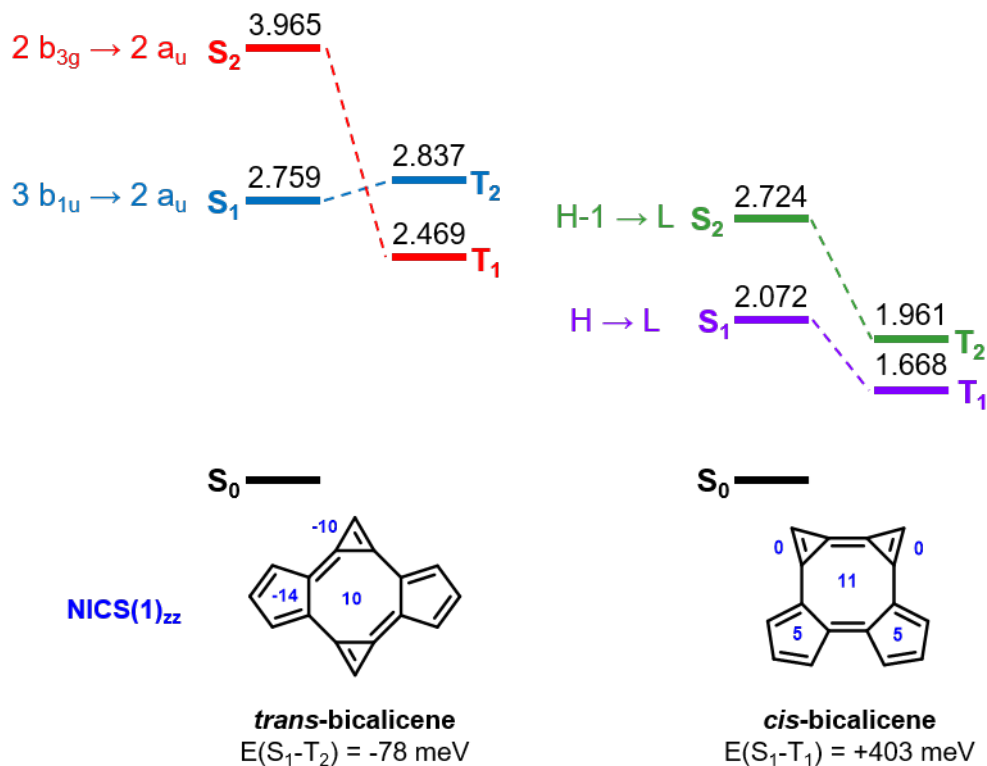

Figure S1: State diagram of the *trans* and *cis* dimers of calicene. The push-pull aromatic *trans*-bicalicene has a Hund's rule violation between the  $S_1$  and  $T_2$  states.<sup>1-3</sup> The hypothetical *cis*-bicalicene is non-planar as it distorts to escape antiaromaticity and has a conventional ordering that follows Hund's rule. Geometries relaxed at the  $\omega$ B97X-D/def2-TZVP level; excited state energies computed at the EOM-CCSD/cc-pVDZ level; nucleus-independent chemical shifts evaluated at the B3LYP/6-31G(d)<sup>4,5</sup> level using the out-of-plane components of the magnetic shielding tensor at 1 Å above the centroid of each ring<sup>6</sup> (NICS(1)<sub>zz</sub>, in blue) using the gauge-independent atomic orbital method.<sup>7,8</sup>

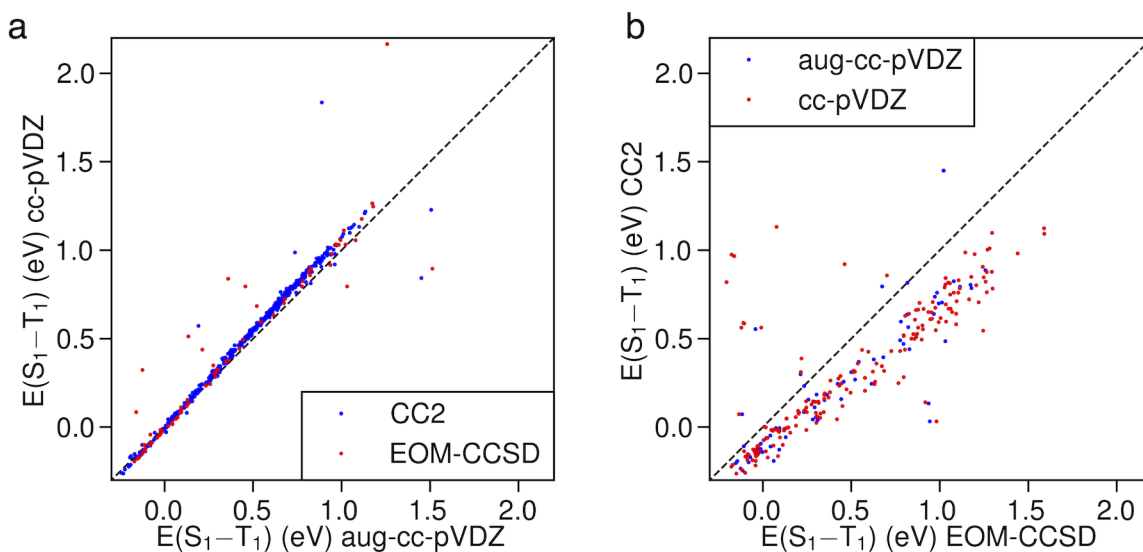

Figure S2: Method comparison of singlet-triplet gap computations based on all three sets of molecules (unsubstituted, constrained, and substituted molecules). a) cc-pVDZ basis plotted against aug-cc-pVDZ basis. b) CC2 plotted against EOM-CCSD. There are several outliers in the two plots where the two methods result in states of different electronic configurations corresponding to  $S_1$  or  $T_1$ , thus severely affecting the gap.

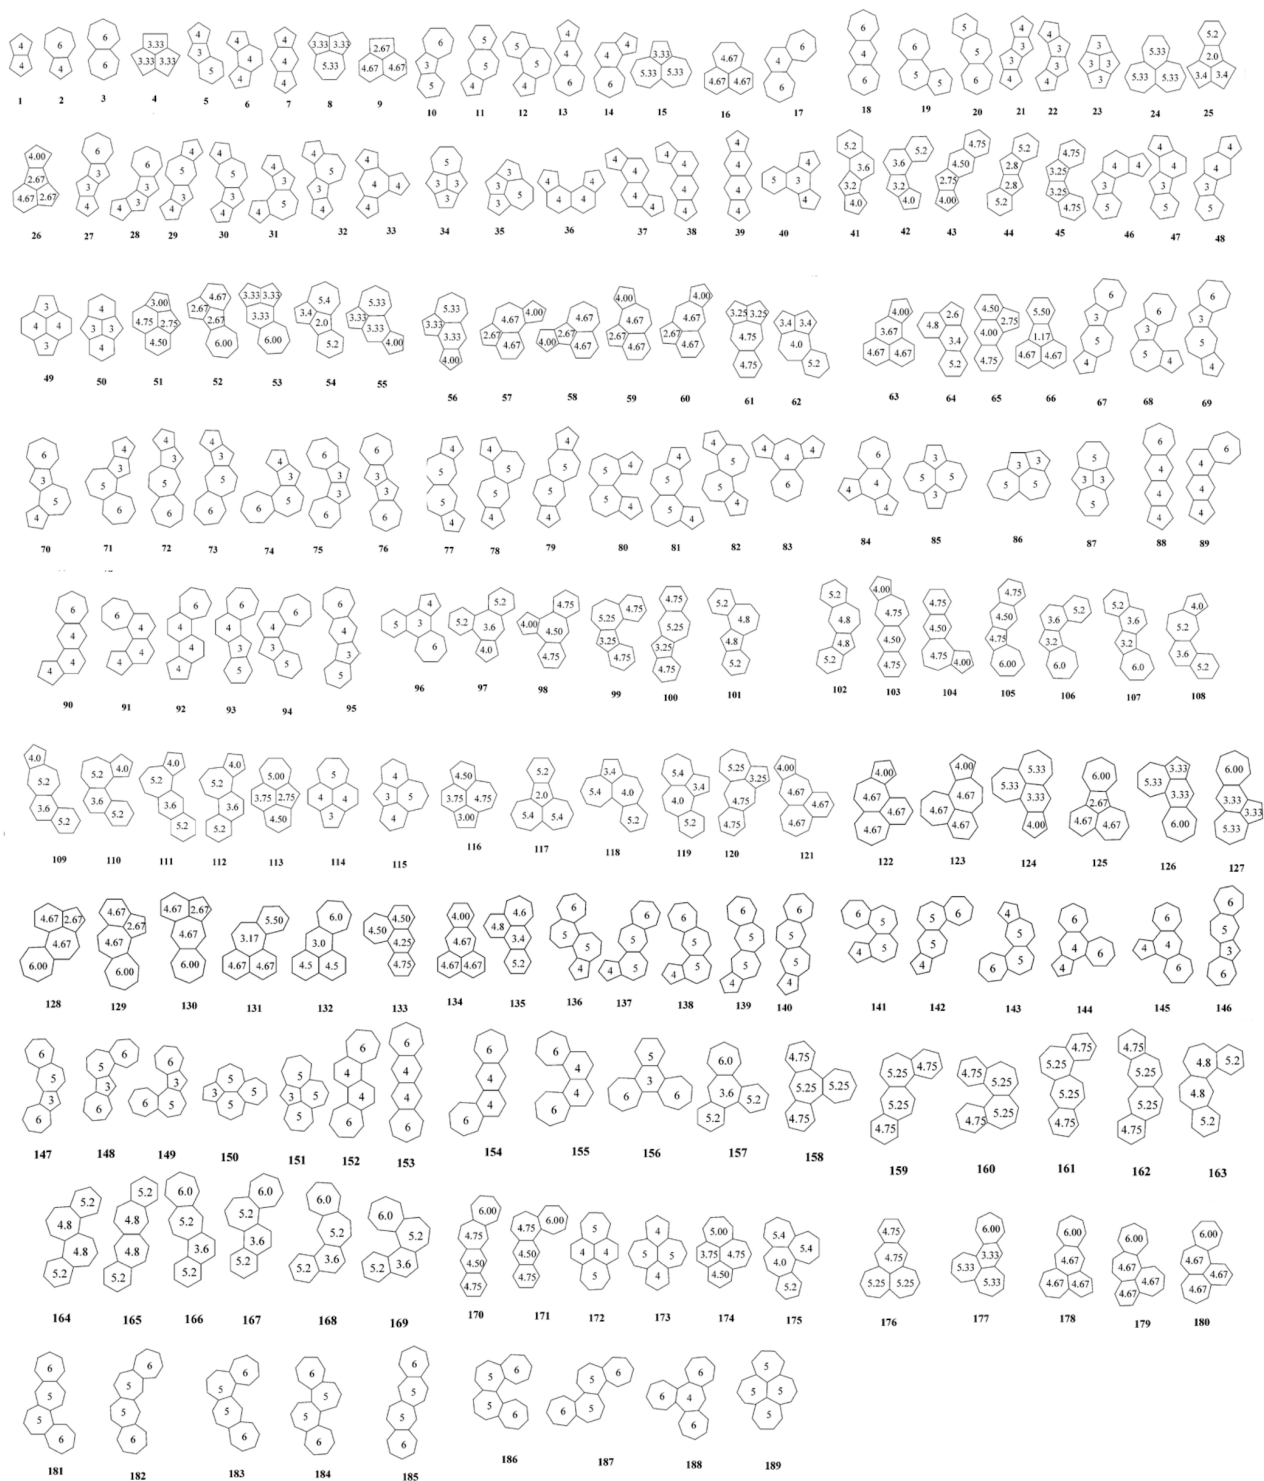

Figure S3: The complete set of 187 fused non-alternant hydrocarbons, with the total number of  $\pi$ -electrons partitioned by each ring. In the original set of 189 molecules, entries 159 and 161 are duplicates, as are entries 184 and 187. Adapted from Balaban & Randic, *J. Chem. Inf. Comput. Sci.* **2004**, *44*, 1701-1707, © 2023 American Chemical Society.

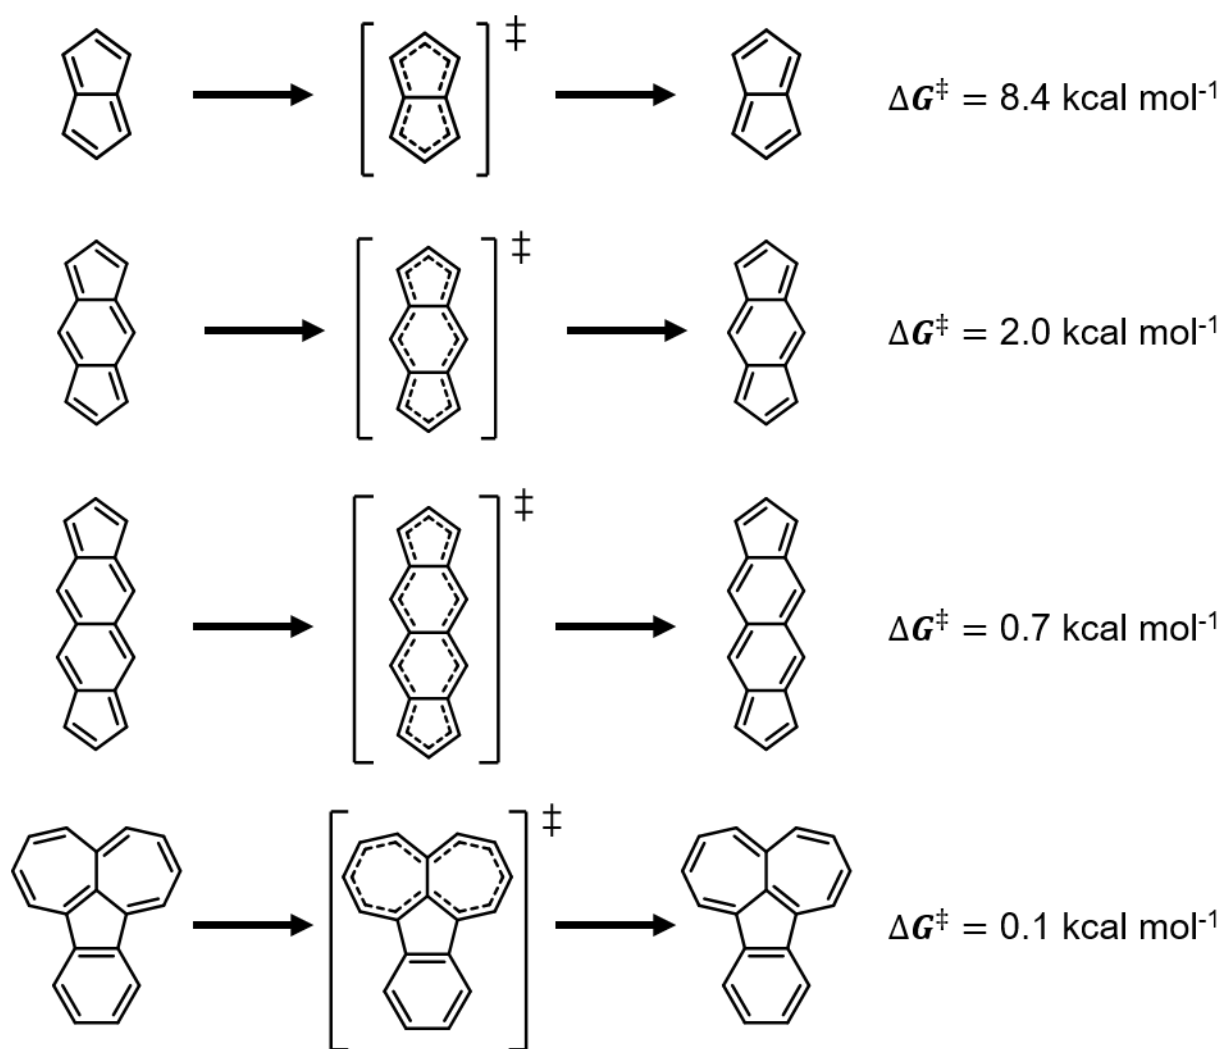

Figure S4: Free energy difference between the double-bond localized ground-state structures and the high-symmetry transition states structures for unsubstituted pentalene, *s*-indacene, dicyclopenta[*b, g*]naphthalene, and indeno[1,2,3-*ef*]heptalene. Structures computed at the  $\omega$ B97X-D/def2-TZVP level. Transition states were confirmed by the presence of a single negative frequency, which in each case corresponded to the expected vibrational mode connecting the (equivalent) left and right bond-localized minima.

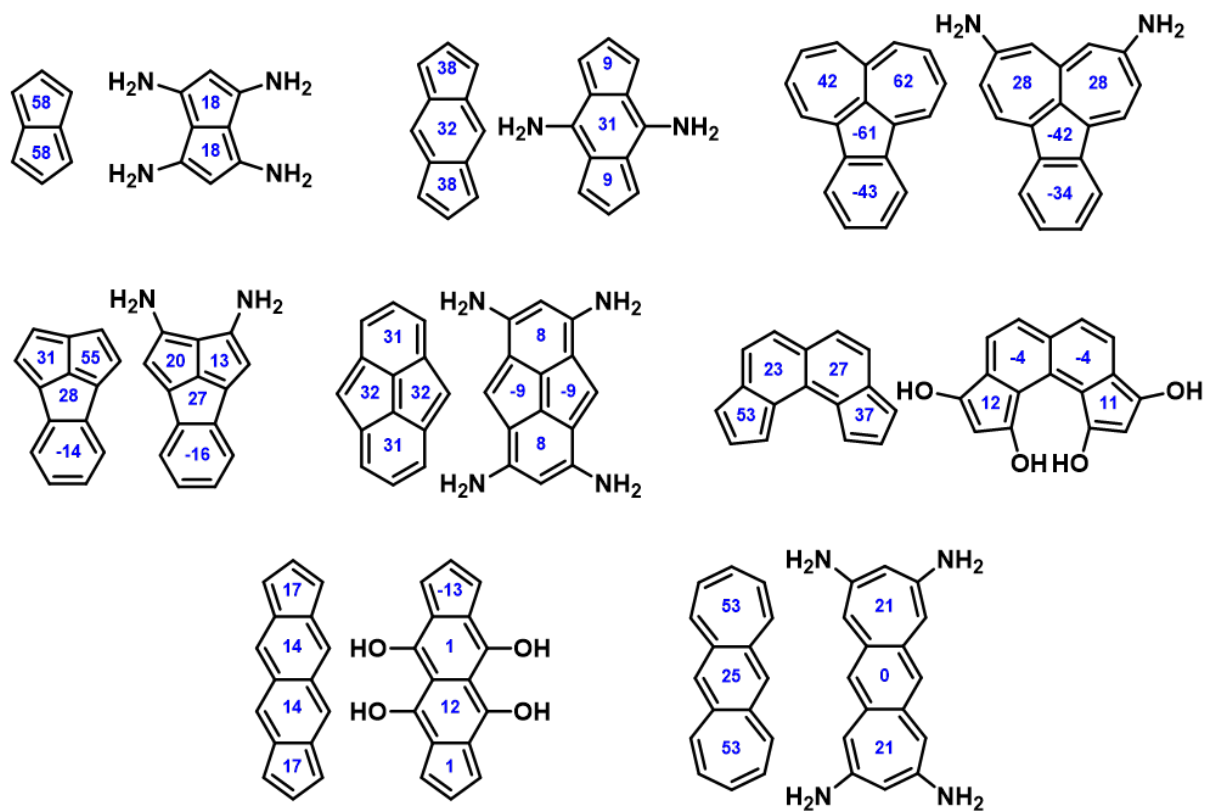

Figure S5: Nucleus-independent chemical shifts for the unconstrained ground-state structures of bare and substituted non-alternant hydrocarbons, computed using the out-of-plane components of the magnetic shielding tensor at 1 Å above the centroid of each ring<sup>6</sup> (NICS(1)<sub>zz</sub>) using the gauge-independent atomic orbital method.<sup>7,8</sup> Geometries relaxed at the  $\omega$ B97X-D/def2-TZVP level; NICS computed at the B3LYP/6-31G(d)<sup>4,5</sup> level of theory.

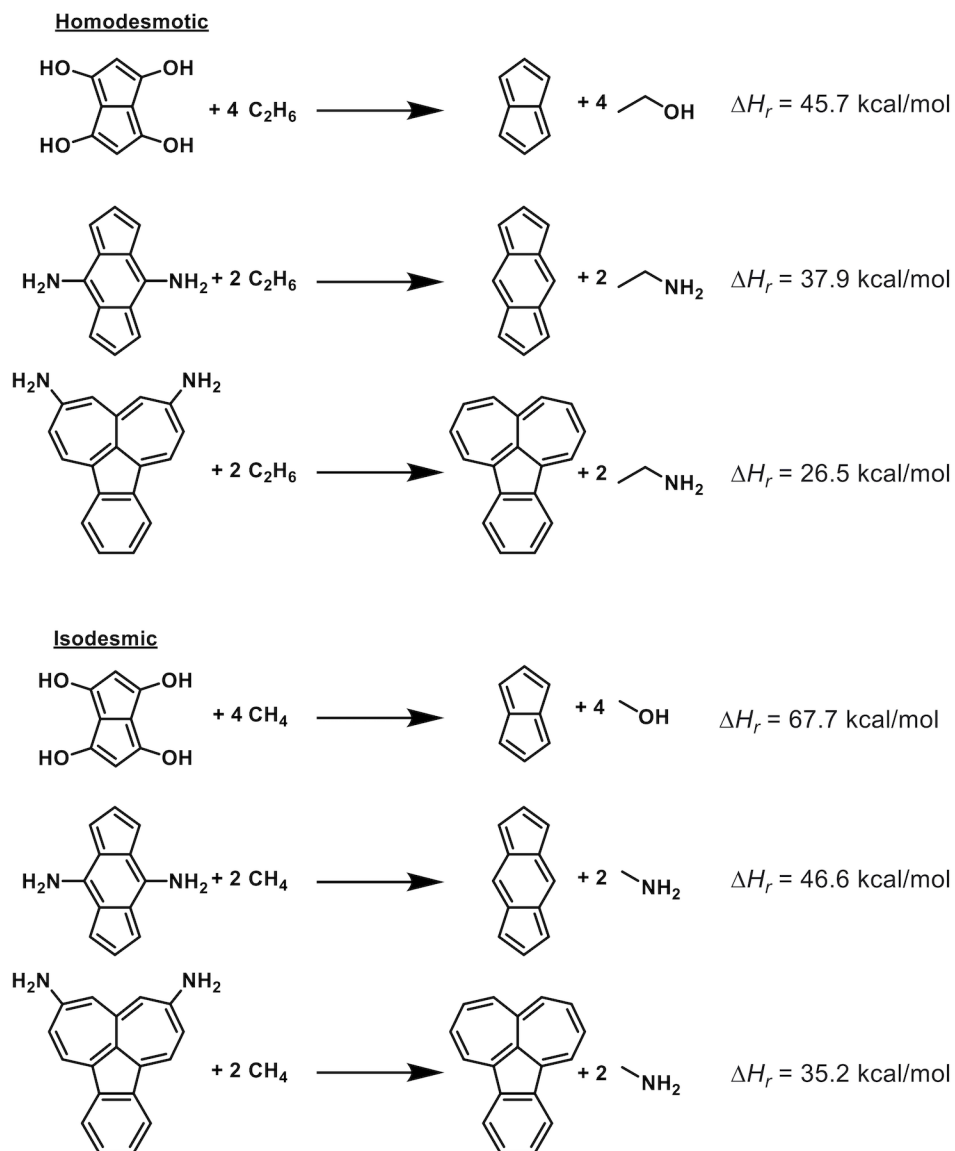

Figure S6: Thermodynamic stabilization of select substituted molecules estimated by homodesmotic and isodesmic reaction equations; computed at the  $\omega$ B97X-D/def2-TZVP level using the ground-state geometries.<sup>9</sup>

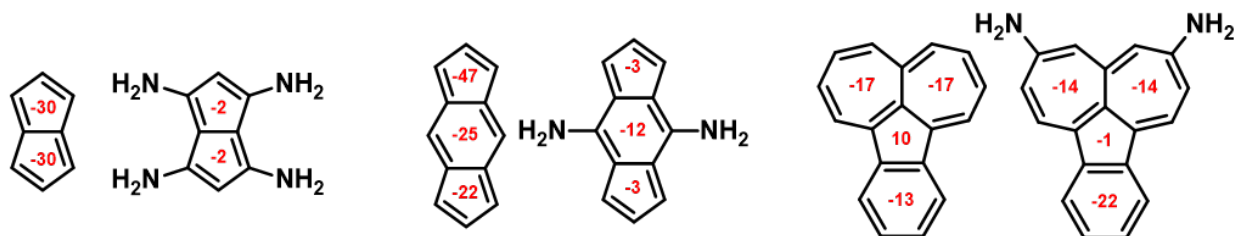

Figure S7: NICS of the optimized  $T_1$  structures of select non-alternant hydrocarbons, computed using the out-of-plane components of the magnetic shielding tensor at 1 Å above the centroid of each ring<sup>6</sup> ( $\text{NICS}(1)_{zz}$ ) using the gauge-independent atomic orbital method.<sup>7,8</sup> Geometries were relaxed using unrestricted DFT at the  $\omega\text{B97X-D}/\text{def2-TZVP}$  level; NICS computed at the  $\text{B3LYP}/6\text{-31G(d)}$ <sup>4,5</sup> level of theory.



## Data tables

Table S1: Singlet-triplet gaps computed for the non-alternant hydrocarbon set;  $T_x$  is the triplet state with the same electron configuration as  $S_1$ . Energies are given in eV.

| Name  | CC2                          |                          | EOM-CCSD                     |                              | cc-pVDZ                  |                          | cc-pVDZ                  |                          |
|-------|------------------------------|--------------------------|------------------------------|------------------------------|--------------------------|--------------------------|--------------------------|--------------------------|
|       | aug-cc-pVDZ<br>$S_1-T_1$ gap | cc-pVDZ<br>$S_1-T_1$ gap | aug-cc-pVDZ<br>$S_1-T_1$ gap | aug-cc-pVDZ<br>$S_1-T_x$ gap | cc-pVDZ<br>$S_1-T_1$ gap | cc-pVDZ<br>$S_1-T_x$ gap | cc-pVDZ<br>$S_1-T_1$ gap | cc-pVDZ<br>$S_1-T_x$ gap |
| mol1  | 0.792                        | 0.856                    | 1.019                        |                              | 1.019                    | 1.088                    | 1.088                    |                          |
| mol2  | -0.005                       | -0.021                   | 0.073                        |                              | 0.073                    | 0.055                    | 0.055                    |                          |
| mol3  | 0.637                        | 0.702                    | 0.817                        |                              | 0.817                    | 0.886                    | 0.886                    |                          |
| mol4  | 0.759                        | 0.831                    |                              |                              |                          | 1.106                    | 1.106                    |                          |
| mol5  | 0.698                        | 0.752                    |                              |                              |                          |                          |                          |                          |
| mol6  | 0.699                        | 0.750                    | 0.994                        | 0.994                        | 1.058                    | 1.058                    |                          |                          |
| mol7  | 0.269                        | 0.318                    | 0.521                        | 0.521                        | 0.685                    | 0.555                    |                          |                          |
| mol8  | -0.023                       | -0.026                   | 0.093                        | 0.093                        | 0.091                    | 0.091                    |                          |                          |
| mol9  | 0.752                        | 0.805                    |                              |                              |                          |                          |                          |                          |
| mol10 | 0.342                        | 0.379                    |                              |                              |                          |                          |                          |                          |
| mol11 | 0.395                        | 0.431                    | 0.681                        | 0.681                        | 0.725                    | 0.725                    |                          |                          |
| mol12 | 0.300                        | 0.328                    |                              |                              |                          |                          |                          |                          |
| mol13 | 0.190                        | 0.214                    |                              |                              | 0.472                    | 0.472                    |                          |                          |
| mol14 | 0.424                        | 0.462                    |                              |                              |                          |                          |                          |                          |
| mol15 | -0.012                       | -0.017                   | 0.089                        | 0.089                        | 0.081                    | 0.081                    |                          |                          |
| mol16 | 0.705                        | 0.785                    | 1.012                        | 1.012                        | 1.112                    | 1.112                    |                          |                          |
| mol17 | 0.471                        | 0.521                    |                              |                              |                          |                          |                          |                          |
| mol18 | 0.376                        | 0.437                    |                              |                              | 0.560                    | 0.560                    |                          |                          |
| mol19 | 0.698                        | 0.773                    |                              |                              |                          |                          |                          |                          |
| mol20 | 0.650                        | 0.712                    |                              |                              | 1.095                    | 1.095                    |                          |                          |
| mol21 | 0.314                        | 0.345                    |                              |                              | 0.673                    | 0.673                    |                          |                          |
| mol22 | 0.544                        | 0.582                    |                              |                              | 1.092                    | 1.092                    |                          |                          |
| mol23 | 0.641                        | 0.694                    | 0.966                        | 0.966                        | 1.033                    | 1.033                    |                          |                          |
| mol24 | 0.591                        | 0.657                    |                              |                              |                          |                          |                          |                          |
| mol25 | 0.645                        | 0.708                    |                              |                              | 0.960                    | 0.960                    |                          |                          |
| mol26 | 0.605                        | 0.650                    |                              |                              |                          |                          |                          |                          |
| mol27 | 0.379                        | 0.410                    |                              |                              |                          |                          |                          |                          |
| mol28 | 0.382                        | 0.411                    |                              |                              |                          |                          |                          |                          |
| mol29 | 0.297                        | 0.331                    |                              |                              |                          |                          |                          |                          |
| mol30 | 0.385                        | 0.405                    |                              |                              |                          |                          |                          |                          |
| mol31 | 0.393                        | 0.430                    |                              |                              |                          |                          |                          |                          |
| mol32 | 0.438                        | 0.463                    |                              |                              |                          |                          |                          |                          |
| mol33 | 0.510                        | 0.553                    |                              |                              | 0.904                    | 0.904                    |                          |                          |
| mol34 | 0.181                        | 0.190                    |                              |                              |                          |                          |                          |                          |
| mol35 | -0.005                       | -0.011                   | 0.093                        | 0.093                        | 0.085                    | 0.085                    |                          |                          |
| mol36 | 0.542                        | 0.597                    |                              |                              | 1.035                    | 0.667                    |                          |                          |
| mol37 | 0.511                        | 0.561                    |                              |                              |                          |                          |                          |                          |
| mol38 | 0.666                        | 0.721                    |                              |                              |                          |                          |                          |                          |
| mol39 | 0.786                        | 0.848                    | 1.178                        | 0.283                        | 1.248                    | 0.305                    |                          |                          |
| mol40 | 0.586                        | 0.632                    |                              |                              |                          |                          |                          |                          |
| mol41 | 0.651                        | 0.703                    |                              |                              |                          |                          |                          |                          |
| mol42 | 0.652                        | 0.705                    |                              |                              |                          |                          |                          |                          |
| mol43 | 0.687                        | 0.742                    |                              |                              |                          |                          |                          |                          |
| mol44 | 0.556                        | 0.600                    |                              |                              |                          |                          |                          |                          |
| mol45 | 0.606                        | 0.650                    |                              |                              | 0.953                    | 0.953                    |                          |                          |
| mol46 | 0.701                        | 0.758                    |                              |                              |                          |                          |                          |                          |
| mol47 | 0.726                        | 0.788                    |                              |                              |                          |                          |                          |                          |
| mol48 | 0.649                        | 0.709                    |                              |                              |                          |                          |                          |                          |
| mol49 | 0.641                        | 0.686                    |                              |                              |                          |                          |                          |                          |
| mol50 | 0.708                        | 0.761                    |                              |                              | 1.104                    | 1.104                    |                          |                          |
| mol51 | 0.644                        | 0.694                    |                              |                              |                          |                          |                          |                          |
| mol52 | 0.417                        | 0.463                    |                              |                              |                          |                          |                          |                          |
| mol53 | 0.070                        | 0.085                    |                              |                              | 0.344                    | 0.344                    |                          |                          |
| mol54 | 0.010                        | 0.007                    |                              |                              |                          |                          |                          |                          |
| mol55 | 0.287                        | 0.314                    |                              |                              | 0.622                    | 0.622                    |                          |                          |
| mol56 | 0.272                        | 0.301                    |                              |                              |                          |                          |                          |                          |
| mol57 | 0.306                        | 0.331                    |                              |                              |                          |                          |                          |                          |
| mol58 | 0.490                        | 0.535                    |                              |                              |                          |                          |                          |                          |
| mol59 | 0.372                        | 0.403                    |                              |                              |                          |                          |                          |                          |
| mol60 | 0.572                        | 0.628                    |                              |                              |                          |                          |                          |                          |
| mol61 | 0.368                        | 0.388                    |                              |                              | 0.218                    | 0.218                    |                          |                          |
| mol62 | 0.077                        | 0.083                    |                              |                              | 0.205                    | 0.205                    |                          |                          |
| mol63 | 0.843                        | 0.913                    |                              |                              |                          |                          |                          |                          |
| mol64 | 0.878                        | 0.927                    |                              |                              |                          |                          |                          |                          |
| mol65 | 0.853                        | 0.913                    |                              |                              |                          |                          |                          |                          |
| mol66 | 0.961                        | 0.921                    |                              |                              |                          |                          |                          |                          |
| mol67 | 0.108                        | 0.112                    |                              |                              | 0.245                    | 0.245                    |                          |                          |
| mol68 | 0.075                        | 0.077                    |                              |                              | 0.202                    | 0.202                    |                          |                          |
| mol69 | 0.245                        | 0.247                    | 0.422                        | 0.087                        | 0.445                    | 0.120                    |                          |                          |
| mol70 | 0.300                        | 0.290                    | 0.213                        | 0.163                        | 0.438                    | 0.163                    |                          |                          |
| mol71 | 0.573                        | 0.615                    |                              |                              |                          |                          |                          |                          |
| mol72 | 0.492                        | 0.523                    |                              |                              |                          |                          |                          |                          |
| mol73 | 0.541                        | 0.576                    |                              |                              | 0.901                    | 0.901                    |                          |                          |
| mol74 | 0.438                        | 0.481                    |                              |                              |                          |                          |                          |                          |
| mol75 | 0.264                        | 0.275                    |                              |                              |                          |                          |                          |                          |
| mol76 | 0.057                        | 0.057                    |                              |                              | 0.186                    | 0.186                    |                          |                          |
| mol77 | 0.019                        | 0.045                    |                              |                              | 0.418                    | 0.107                    |                          |                          |
| mol78 | 0.120                        | 0.137                    |                              |                              |                          |                          |                          |                          |
| mol79 | 0.131                        | 0.134                    |                              |                              |                          |                          |                          |                          |

| Name   | CC2<br>aug-cc-pvdz<br>S <sub>1</sub> -T <sub>1</sub> gap | cc-pVDZ<br>S <sub>1</sub> -T <sub>1</sub> gap | EOM-CCSD<br>aug-cc-pVDZ<br>S <sub>1</sub> -T <sub>1</sub> gap | aug-cc-pVDZ<br>S <sub>1</sub> -T <sub>x</sub> gap | cc-pVDZ<br>S <sub>1</sub> -T <sub>1</sub> gap | cc-pVDZ<br>S <sub>1</sub> -T <sub>x</sub> gap |
|--------|----------------------------------------------------------|-----------------------------------------------|---------------------------------------------------------------|---------------------------------------------------|-----------------------------------------------|-----------------------------------------------|
| mol81  | 0.129                                                    | 0.134                                         |                                                               |                                                   |                                               |                                               |
| mol82  | 0.128                                                    | 0.133                                         |                                                               |                                                   |                                               |                                               |
| mol83  | 0.523                                                    | 0.563                                         |                                                               |                                                   | 0.878                                         | 0.878                                         |
| mol84  | 0.500                                                    | 0.545                                         |                                                               |                                                   |                                               |                                               |
| mol85  | -0.047                                                   | -0.061                                        | 0.042                                                         | 0.042                                             | 0.026                                         | 0.026                                         |
| mol86  | 0.065                                                    | 0.064                                         |                                                               |                                                   |                                               |                                               |
| mol87  | -0.123                                                   | -0.132                                        | -0.014                                                        | -0.014                                            | -0.021                                        | -0.021                                        |
| mol88  | 0.591                                                    | 0.651                                         |                                                               |                                                   | 1.069                                         | 1.069                                         |
| mol89  | 0.659                                                    | 0.704                                         |                                                               |                                                   |                                               |                                               |
| mol90  | 0.485                                                    | 0.535                                         |                                                               |                                                   |                                               |                                               |
| mol91  | 0.390                                                    | 0.432                                         |                                                               |                                                   |                                               |                                               |
| mol92  | 0.380                                                    | 0.424                                         |                                                               |                                                   |                                               |                                               |
| mol93  | 0.801                                                    | 0.887                                         |                                                               |                                                   |                                               |                                               |
| mol94  | 0.710                                                    | 0.779                                         |                                                               |                                                   |                                               |                                               |
| mol95  | 0.512                                                    | 0.564                                         |                                                               |                                                   |                                               |                                               |
| mol96  | 0.395                                                    | 0.463                                         |                                                               |                                                   |                                               |                                               |
| mol97  | 0.664                                                    | 0.723                                         |                                                               |                                                   |                                               |                                               |
| mol98  | -0.010                                                   | -0.016                                        |                                                               |                                                   | 0.245                                         | 0.068                                         |
| mol99  | 0.314                                                    | 0.334                                         |                                                               |                                                   |                                               |                                               |
| mol100 | 0.422                                                    | 0.451                                         |                                                               |                                                   |                                               |                                               |
| mol101 | 0.494                                                    | 0.554                                         |                                                               |                                                   |                                               |                                               |
| mol102 | 0.385                                                    | 0.437                                         |                                                               |                                                   |                                               |                                               |
| mol103 | 0.578                                                    | 0.628                                         |                                                               |                                                   |                                               |                                               |
| mol104 | 0.458                                                    | 0.501                                         |                                                               |                                                   |                                               |                                               |
| mol105 | 0.477                                                    | 0.528                                         |                                                               |                                                   | 0.872                                         | 0.872                                         |
| mol106 | 0.135                                                    | 0.149                                         |                                                               |                                                   |                                               |                                               |
| mol107 | 0.137                                                    | 0.148                                         |                                                               |                                                   |                                               |                                               |
| mol108 | 0.183                                                    | 0.190                                         |                                                               |                                                   |                                               |                                               |
| mol109 | 0.190                                                    | 0.199                                         |                                                               |                                                   |                                               |                                               |
| mol110 | 0.145                                                    | 0.157                                         |                                                               |                                                   |                                               |                                               |
| mol111 | 0.458                                                    | 0.501                                         |                                                               |                                                   |                                               |                                               |
| mol112 | 0.140                                                    | 0.148                                         |                                                               |                                                   |                                               |                                               |
| mol113 | 0.358                                                    | 0.416                                         |                                                               |                                                   |                                               |                                               |
| mol114 | 0.495                                                    | 0.535                                         |                                                               |                                                   |                                               |                                               |
| mol115 | 0.203                                                    | 0.212                                         |                                                               |                                                   |                                               |                                               |
| mol116 | 0.422                                                    | 0.463                                         |                                                               |                                                   |                                               |                                               |
| mol117 | 0.086                                                    | 0.091                                         | 0.231                                                         | 0.231                                             | 0.239                                         | 0.239                                         |
| mol118 | 0.023                                                    | 0.021                                         |                                                               |                                                   |                                               |                                               |
| mol119 | 0.025                                                    | 0.022                                         |                                                               |                                                   |                                               |                                               |
| mol120 | 0.235                                                    | 0.251                                         |                                                               |                                                   |                                               |                                               |
| mol121 | 0.482                                                    | 0.534                                         |                                                               |                                                   |                                               |                                               |
| mol122 | 0.468                                                    | 0.515                                         |                                                               |                                                   |                                               |                                               |
| mol123 | 0.484                                                    | 0.526                                         |                                                               |                                                   | 0.850                                         | 0.850                                         |
| mol124 | 0.306                                                    | 0.345                                         |                                                               |                                                   |                                               |                                               |
| mol125 | 0.337                                                    | 0.365                                         |                                                               |                                                   |                                               |                                               |
| mol126 | 0.268                                                    | 0.290                                         |                                                               |                                                   |                                               |                                               |
| mol127 | 0.334                                                    | 0.360                                         |                                                               |                                                   | 0.642                                         | 0.020                                         |
| mol128 | 0.673                                                    | 0.734                                         |                                                               |                                                   |                                               |                                               |
| mol129 | 0.466                                                    | 0.515                                         |                                                               |                                                   |                                               |                                               |
| mol130 | 0.543                                                    | 0.597                                         |                                                               |                                                   |                                               |                                               |
| mol131 | 0.922                                                    | 1.016                                         |                                                               |                                                   |                                               |                                               |
| mol132 | 0.720                                                    | 0.794                                         |                                                               |                                                   |                                               |                                               |
| mol133 | 0.805                                                    | 0.890                                         |                                                               |                                                   |                                               |                                               |
| mol134 | 0.805                                                    | 0.877                                         | 1.173                                                         | 1.173                                             | 1.265                                         | 1.265                                         |
| mol135 | 0.782                                                    | 0.868                                         |                                                               |                                                   |                                               |                                               |
| mol136 | 0.004                                                    | -0.003                                        |                                                               |                                                   | 0.135                                         | 0.135                                         |
| mol137 | 0.034                                                    | 0.029                                         |                                                               |                                                   |                                               |                                               |
| mol138 | 0.028                                                    | 0.026                                         |                                                               |                                                   |                                               |                                               |
| mol139 | 0.571                                                    | 0.627                                         |                                                               |                                                   |                                               |                                               |
| mol140 | 0.542                                                    | 0.594                                         |                                                               |                                                   |                                               |                                               |
| mol141 | 0.010                                                    | -0.001                                        |                                                               |                                                   | 0.146                                         | 0.056                                         |
| mol142 | 0.042                                                    | 0.037                                         |                                                               |                                                   |                                               |                                               |
| mol143 | 0.000                                                    | -0.011                                        |                                                               |                                                   | 0.120                                         | 0.073                                         |
| mol144 | 0.651                                                    | 0.722                                         |                                                               |                                                   |                                               |                                               |
| mol145 | 0.664                                                    | 0.728                                         |                                                               |                                                   |                                               |                                               |
| mol146 | 0.111                                                    | 0.110                                         |                                                               |                                                   |                                               |                                               |
| mol147 | 0.461                                                    | 0.513                                         |                                                               |                                                   |                                               |                                               |
| mol148 | 0.062                                                    | 0.059                                         |                                                               |                                                   |                                               |                                               |
| mol149 | 0.072                                                    | 0.068                                         |                                                               |                                                   |                                               |                                               |
| mol150 | 0.027                                                    | 0.028                                         |                                                               |                                                   |                                               |                                               |
| mol151 | -0.009                                                   | -0.013                                        |                                                               |                                                   | 0.066                                         | 0.066                                         |
| mol152 | 0.790                                                    | 0.843                                         |                                                               |                                                   |                                               |                                               |
| mol153 | 0.853                                                    | 0.922                                         |                                                               |                                                   | 0.462                                         | 0.462                                         |
| mol154 | 0.696                                                    | 0.762                                         |                                                               |                                                   |                                               |                                               |
| mol155 | 0.648                                                    | 0.706                                         |                                                               |                                                   | 1.219                                         | 0.673                                         |
| mol156 | 0.454                                                    | 0.499                                         |                                                               |                                                   |                                               |                                               |
| mol157 | 0.816                                                    | 0.903                                         |                                                               |                                                   |                                               |                                               |
| mol158 | 1.040                                                    | 1.124                                         |                                                               |                                                   | 1.589                                         | 1.589                                         |
| mol159 | 0.850                                                    | 0.920                                         |                                                               |                                                   |                                               |                                               |

| Name   | CC2                                               |                                               | EOM-CCSD                                          |                                                   | cc-pVDZ<br>S <sub>1</sub> -T <sub>1</sub> gap | cc-pVDZ<br>S <sub>1</sub> -T <sub>x</sub> gap |
|--------|---------------------------------------------------|-----------------------------------------------|---------------------------------------------------|---------------------------------------------------|-----------------------------------------------|-----------------------------------------------|
|        | aug-cc-pVDZ<br>S <sub>1</sub> -T <sub>1</sub> gap | cc-pVDZ<br>S <sub>1</sub> -T <sub>1</sub> gap | aug-cc-pVDZ<br>S <sub>1</sub> -T <sub>1</sub> gap | aug-cc-pVDZ<br>S <sub>1</sub> -T <sub>x</sub> gap |                                               |                                               |
| moll60 | 1.009                                             | 1.093                                         |                                                   |                                                   |                                               |                                               |
| moll62 | 0.762                                             | 0.823                                         |                                                   |                                                   | 1.591                                         | 1.591                                         |
| moll63 | 0.773                                             | 0.842                                         |                                                   |                                                   | 1.259                                         | 1.259                                         |
| moll64 | 0.754                                             | 0.829                                         |                                                   |                                                   |                                               |                                               |
| moll65 | 0.542                                             | 0.595                                         |                                                   |                                                   | 0.993                                         | 0.993                                         |
| moll66 | 0.613                                             | 0.671                                         |                                                   |                                                   | 1.061                                         | 1.061                                         |
| moll67 | 0.684                                             | 0.752                                         |                                                   |                                                   |                                               |                                               |
| moll68 | 0.613                                             | 0.671                                         |                                                   |                                                   |                                               |                                               |
| moll69 | 0.871                                             | 0.957                                         |                                                   |                                                   |                                               |                                               |
| moll70 | 0.669                                             | 0.731                                         |                                                   |                                                   |                                               |                                               |
| moll71 | 0.711                                             | 0.794                                         |                                                   |                                                   |                                               |                                               |
| moll72 | 0.494                                             | 0.545                                         |                                                   |                                                   | 1.245                                         | 1.245                                         |
| moll73 | 0.852                                             | 0.929                                         |                                                   |                                                   |                                               |                                               |
| moll74 | 0.618                                             | 0.687                                         |                                                   |                                                   |                                               |                                               |
| moll75 | 0.597                                             | 0.665                                         |                                                   |                                                   |                                               |                                               |
| moll76 | 0.638                                             | 0.709                                         |                                                   |                                                   |                                               |                                               |
| moll77 | 0.625                                             | 0.702                                         |                                                   |                                                   |                                               |                                               |
| moll78 | 0.721                                             | 0.797                                         |                                                   |                                                   |                                               |                                               |
| moll79 | 0.665                                             | 0.747                                         |                                                   |                                                   |                                               |                                               |
| moll80 | 0.714                                             | 0.783                                         |                                                   |                                                   |                                               |                                               |
| moll81 | 0.621                                             | 0.682                                         |                                                   |                                                   |                                               |                                               |
| moll82 | 0.563                                             | 0.617                                         |                                                   |                                                   | 1.004                                         | 1.004                                         |
| moll83 | 0.668                                             | 0.734                                         |                                                   |                                                   |                                               |                                               |
| moll84 | 0.680                                             | 0.764                                         |                                                   |                                                   | 1.265                                         | 1.265                                         |
| moll85 | 0.607                                             | 0.670                                         |                                                   |                                                   | 1.049                                         | 1.049                                         |
| moll86 | 0.639                                             | 0.706                                         |                                                   |                                                   |                                               |                                               |
| moll88 | 0.689                                             | 0.784                                         |                                                   |                                                   | 1.297                                         | 1.297                                         |
| moll89 | 0.577                                             | 0.647                                         |                                                   |                                                   |                                               |                                               |

Table S2: Singlet-triplet gaps computed for the avoided symmetry set;  $T_x$  is the triplet state with the same electron configuration as  $S_1$ . Energies are given in eV.

| Name          | Description                 | CC2           | cc-pVDZ       | EOM-CCSD      | aug-cc-pVDZ   | cc-pVDZ       | cc-pVDZ       |
|---------------|-----------------------------|---------------|---------------|---------------|---------------|---------------|---------------|
|               |                             | aug-cc-pVDZ   | cc-pVDZ       | aug-cc-pVDZ   | aug-cc-pVDZ   | cc-pVDZ       | cc-pVDZ       |
|               |                             | $S_1-T_1$ gap | $S_1-T_1$ gap | $S_1-T_1$ gap | $S_1-T_x$ gap | $S_1-T_1$ gap | $S_1-T_x$ gap |
| mol1_d2h      | $D_{2h}$ pentalene          | -0.234        | -0.263        | -0.126        | -0.126        | -0.150        | -0.150        |
| mol3_d2h      | $D_{2h}$ heptalene          | -0.203        | -0.223        | -0.153        | -0.153        | -0.178        | -0.178        |
| mol3_d2       | curved $D_2$ , no BLA       | -0.192        | -0.211        | -0.145        | -0.145        | -0.170        | -0.170        |
| mol4_c2v      | planar, BLA in one ring     | 0.737         | 0.791         | 0.971         | 0.971         | 1.027         | 1.027         |
| mol4_d3h      | planar                      | 0.246         | 0.258         | 0.614         | 0.614         | 0.634         | 0.634         |
| mol7_d2h      | $D_{2h}$ indacene           | -0.191        | -0.163        | 0.061         | -0.161        | 0.085         | -0.184        |
| mol13_c2v     | planar, $C_{2v}$            | -0.060        | -0.072        | 0.021         | 0.021         | 0.008         | 0.008         |
| mol18_d2h     | planar, $D_{2h}$            | 0.039         | 0.053         | 0.309         | -0.125        | 0.324         | -0.149        |
| mol21_c2h     | planar, $C_{2h}$            | -0.008        | -0.018        | 0.125         | 0.125         | 0.119         | 0.119         |
| mol22_c2v     | planar, $C_{2v}$            | 0.311         | 0.312         | 0.500         | 0.134         | 0.513         | 0.113         |
| mol23_c2v     | curved, $C_{2v}$ , no BLA   | 0.471         | 0.501         | 0.794         | 0.358         | 0.840         | 0.366         |
| mol23_d2h     | planar, $D_{2h}$            | 0.184         | 0.191         | 0.303         | 0.275         | 0.350         | 0.278         |
| mol24_c2v     | planar, $C_{2v}$ , with BLA | 0.555         | 0.611         |               |               | 0.947         | 0.947         |
| mol24_d3h     | planar, $D_{3h}$            |               | -0.186        | -0.041        | -0.159        | -0.059        | -0.180        |
| mol25_c2v     | planar, $C_{2v}$ , no BLA   | 0.073         | 0.074         | -0.117        | -0.117        | -0.135        | -0.135        |
| mol25_cs      | curved $C_s$ , no BLA       | -0.122        | -0.140        | -0.030        | -0.030        | -0.046        | -0.046        |
| mol33_c2v     | planar, $C_{2v}$            | 0.156         | 0.147         | 0.258         | 0.258         | 0.243         | 0.243         |
| mol34_c2v     | planar, $C_{2v}$            | 0.183         | 0.198         | 0.361         | 0.361         | 0.379         | 0.379         |
| mol35_c2v     | planar, $C_{2v}$            | -0.007        | -0.014        | 0.093         | 0.093         | 0.085         | 0.085         |
| mol36_c2      | curved, $C_2$ , no BLA      | 0.043         | 0.062         | 0.282         | -0.127        | 0.306         | -0.141        |
| mol36_c2v     | planar, $C_{2v}$ , no BLA   | 0.057         | 0.078         | 0.299         | -0.122        | 0.325         | -0.136        |
| mol39_d2h     | planar, $D_{2h}$            | 0.566         | 0.608         | 0.822         | -0.180        | 0.859         | -0.201        |
| mol45_c2v     | planar, $C_{2v}$ , no BLA   | 0.048         | 0.048         | 0.134         | 0.134         | 0.132         | 0.132         |
| mol50_c2h     | planar, $C_{2h}$ , with BLA | 0.795         | 0.850         | 1.114         | 1.114         | 1.177         | 1.177         |
| mol50_c2v     | curved, $C_{2v}$ , no BLA   | 0.795         | 0.858         | 0.674         | -0.139        | 0.701         | -0.160        |
| mol50_d2h     | planar, $D_{2h}$            | 0.033         | 0.033         | 0.943         | -0.140        | 0.981         | -0.162        |
| mol80_c2v     | planar, $C_{2v}$            | 0.171         | 0.183         |               |               | 0.347         | 0.347         |
| mol82_c2h     | planar, $C_{2h}$            | 0.126         | 0.129         |               |               | 0.274         | 0.274         |
| mol83_c2      | curved, $C_2$ , no BLA      | 0.259         | 0.264         |               |               | 0.382         | 0.020         |
| mol83_c2v     | planar, $C_{2v}$ , no BLA   | 0.349         | 0.360         |               |               | 0.536         | 0.030         |
| mol83_cs      | planar, $C_s$ , with BLA    | 0.383         | 0.399         | 0.627         | 0.1628        |               |               |
| mol88_c2v     | planar, $C_{2v}$ , no BLA   | -0.073        | -0.083        | 0.004         | 0.004         |               |               |
| mol117_c2v    | planar, $C_{2v}$ , no BLA   | -0.093        | -0.104        | -0.012        | -0.012        | -0.026        | -0.026        |
| mol150_c2v    | planar, $C_{2v}$            | 0.081         | 0.086         |               |               | 0.248         | 0.248         |
| mol153_d2h    | planar, $D_{2h}$            | 0.642         | 0.675         |               |               | 0.975         | -0.155        |
| mol155_c2     | curved, $C_2$ , no BLA      | 0.110         | 0.119         |               |               | 0.449         | -0.105        |
| mol155_c2v    | planar, $C_{2v}$ , no BLA   | 0.210         | 0.244         |               |               | 0.631         | -0.067        |
| mol158_c2     | curved, $C_2$ , no BLA      | -0.124        | -0.136        |               |               | -0.107        | -0.107        |
| mol158_c2v    | planar, $C_{2v}$ , no BLA   | -0.139        | -0.155        |               |               | -0.082        | -0.115        |
| mol160_c2     | curved, $C_2$ , no BLA      | 0.090         | 0.093         |               |               | 0.199         | 0.199         |
| mol160_c2v    | planar, $C_{2v}$ , no BLA   | 0.142         | 0.144         |               |               | 0.295         | 0.295         |
| mol162_c2     | curved, $C_2$ , no BLA      | -0.012        | -0.016        |               |               | 0.048         | 0.048         |
| mol162_c2v    | planar, $C_{2v}$ , no BLA   | -0.010        | -0.015        |               |               | 0.054         | 0.054         |
| mol182_c2v    | planar, $C_{2v}$ , no BLA   | 0.394         | 0.431         |               |               | 0.775         | 0.775         |
| mol184_c2_in  | curved, $C_2$ , no BLA      | 0.020         | 0.024         |               |               | 0.302         | -0.126        |
| mol184_c2_out | curved, $C_2$ , no BLA      | 0.661         | 0.722         |               |               | 1.165         | 1.165         |
| mol184_c2h    | planar, $C_{2h}$            | 0.461         | 0.510         |               |               | 0.866         | 0.866         |
| mol185_c2h    | planar, $C_{2h}$ , no BLA   | -0.048        | -0.058        |               |               | 0.096         | -0.049        |
| mol185_cs     | planar, $C_s$ , with bla    | 0.400         | 0.438         |               |               | 0.803         | 0.803         |
| mol186_cs     | curved, $C_s$ , no BLA      | 0.482         | 0.548         |               |               | 0.977         | 0.977         |
| mol188_c2     | curved, $C_2$ , no BLA      | 0.009         | -0.001        |               |               | 0.017         | -0.015        |
| mol188_c2v    | planar, $C_{2v}$ , no BLA   | 0.015         | 0.003         |               |               | 0.008         | 0.008         |

Table S3: Singlet-triplet gaps computed for the substituted set;  $T_x$  is the triplet state with the same electron configuration as  $S_1$ . Energies are given in eV.

|                  | CC2<br>aug-cc-pVDZ<br>$S_1-T_1$ gap | cc-pVDZ<br>$S_1-T_1$ gap | EOM-CCSD<br>aug-cc-pVDZ<br>$S_1-T_1$ gap | $S_1-T_x$ gap | cc-pVDZ<br>$S_1-T_1$ gap | $S_1-T_x$ gap |
|------------------|-------------------------------------|--------------------------|------------------------------------------|---------------|--------------------------|---------------|
| mol1_1n_2nme_tbu | -0.080                              | -0.104                   |                                          |               | 0.060                    | 0.060         |
| mol1_1n_2nme     | -0.109                              | -0.136                   | 0.043                                    | 0.043         | 0.017                    | 0.017         |
| mol1_2n_2nme     | 0.125                               | 0.082                    |                                          |               | 0.299                    | -0.069        |
| mol1_1n_2nh2     |                                     |                          | 0.019                                    | 0.019         |                          |               |
| mol1_2n_4nh2     | 0.826                               | 0.814                    | 1.079                                    | -0.202        | 1.057                    | -0.214        |
| mol1_2n_4nme2    | 0.944                               | 0.978                    |                                          |               | 1.196                    | -0.187        |
| mol1_2n_2nh2     |                                     |                          | 0.281                                    | -0.079        |                          |               |
| mol1_2n          | 0.369                               | 0.426                    | 0.542                                    | 0.542         | 0.596                    | 0.596         |
| mol1_2nh         | 0.888                               | 1.835                    | 1.258                                    | 0.029         | 2.166                    | 2.166         |
| mol1_2nh2_1      | -0.147                              | -0.164                   | -0.024                                   | -0.024        | -0.038                   | -0.038        |
| mol1_2nh2_2      | 0.597                               | 0.642                    | 0.779                                    | 0.779         | 0.826                    | 0.826         |
| mol1_2nme2       | -0.133                              | -0.157                   |                                          |               | -0.031                   | -0.031        |
| mol1_4nh2        | -0.057                              | -0.031                   | 0.129                                    | -0.112        | 0.154                    | -0.120        |
| mol1_2oh_1       | 0.145                               | 0.147                    | 0.287                                    | 0.287         | 0.285                    | 0.285         |
| mol1_2oh_2       | 0.761                               | 0.806                    | 0.984                                    | 0.984         | 1.032                    | 1.032         |
| mol1_2ome        | 0.089                               | 0.095                    | 0.233                                    | 0.233         | 0.235                    | 0.235         |
| mol1_4oh_1       | -0.244                              | -0.258                   | -0.115                                   | -0.130        | -0.100                   | -0.141        |
| mol1_4oh_1alt    | -0.140                              | -0.141                   |                                          |               | -0.027                   | -0.027        |
| mol1_4me         | 0.605                               | 0.664                    | 0.816                                    | 0.816         | 0.877                    | 0.877         |
| mol1_4ome        | -0.224                              | -0.240                   | -0.108                                   | -0.108        | -0.120                   | -0.120        |
| mol3_4nh2        | 0.545                               | 0.613                    |                                          |               | 0.955                    | 0.955         |
| mol3_2cf3        | 0.622                               | 0.676                    |                                          |               | 1.047                    | 1.047         |
| mol7_1n          | 0.441                               | 0.496                    | 0.829                                    | 0.829         | 0.897                    | 0.897         |
| mol7_1p          | 0.158                               | 0.196                    | 0.443                                    | 0.443         | 0.496                    | 0.496         |
| mol7_1p2cl       | 0.203                               | 0.235                    |                                          |               | 0.432                    | 0.432         |
| mol7_1p2ome      | 0.278                               | 0.319                    |                                          |               | 0.514                    | 0.514         |
| mol7_2n          | 0.134                               | 0.141                    | 0.936                                    | 0.879         | 0.918                    | 0.918         |
| mol7_2p          | -0.127                              | -0.100                   | 0.092                                    | -0.121        | 0.113                    | -0.146        |
| mol7_2p2cl       | 0.112                               | 0.136                    | 0.292                                    | 0.139         | 0.316                    | 0.129         |
| mol7_2p2ome      | 0.269                               | 0.314                    |                                          |               | 0.520                    | 0.305         |
| mol7_2nh         | 0.153                               | 0.168                    | 0.348                                    | 0.348         | 0.371                    | 0.371         |
| mol7_2cn26       | 0.175                               | 0.206                    |                                          |               | 0.576                    | 0.430         |
| mol7_2nh2_1      | -0.168                              | -0.185                   | -0.072                                   | -0.072        | -0.088                   | -0.088        |
| mol7_2nh2_2      | 0.486                               | 0.515                    | 1.031                                    | 1.031         | 0.796                    | 0.796         |
| mol7_2nme2_1     | -0.171                              | -0.191                   |                                          |               | -0.037                   | -0.096        |
| mol7_2oh_1       | -0.199                              | -0.216                   | -0.081                                   | -0.113        | -0.042                   | -0.130        |
| mol7_2oh_2       | 0.492                               | 0.520                    | 0.776                                    | 0.776         | 0.810                    | 0.810         |
| mol7_2oh_3       | 0.257                               | 0.283                    | 0.456                                    | -0.108        | 0.476                    | -0.126        |
| mol7_2me         | 0.251                               | 0.280                    |                                          |               | 0.577                    | 0.521         |
| mol7_2ome        | -0.196                              | -0.172                   | -0.002                                   | -0.110        | 0.027                    | -0.128        |
| mol7_4oh         | 1.451                               | 0.843                    | 1.022                                    | -0.172        | 1.033                    | -0.194        |
| mol7_4nh2        | 1.046                               | 1.098                    |                                          |               | 1.295                    | -0.218        |
| mol7_4oh         | 1.451                               | 0.843                    | 1.021                                    | -0.172        | 1.033                    | -0.193        |
| mol7_4ome        | 0.636                               | 0.662                    |                                          |               | 0.864                    | -0.176        |
| mol18_4cn_center | 0.268                               | 0.311                    |                                          |               | 0.214                    | 0.214         |
| mol18_4nh2_out   | 0.593                               | 0.629                    |                                          |               | 0.804                    | -0.305        |
| mol18_diquino    | 0.737                               | 0.988                    |                                          |               | 1.143                    | 0.359         |
| mol18_tetraquino | 0.237                               | 0.250                    |                                          |               | 0.766                    | 0.315         |
| mol24_3nh2       | 0.450                               | 0.500                    |                                          |               | 0.857                    | 0.857         |
| mol25_2nh2_1     | 0.149                               | 0.161                    |                                          |               | 0.347                    | -0.022        |
| mol25_2nh2_2     | 0.261                               | 0.274                    |                                          |               | 0.426                    | 0.426         |
| mol25_2oh_1      | 0.006                               | 0.008                    |                                          |               | 0.187                    | -0.038        |
| mol36_2nh2_2me   | 0.746                               | 0.802                    |                                          |               | 1.206                    | 0.198         |
| mol36_2nme       | 0.885                               | 0.907                    |                                          |               | 1.242                    | 0.065         |
| mol36_2nme_2me   | 0.743                               | 0.761                    |                                          |               | 1.079                    | -0.022        |
| mol36_2ome       | 0.832                               | 0.878                    |                                          |               | 1.294                    | 0.421         |
| mol36_4oh        | 0.892                               | 0.968                    |                                          |               | 1.234                    | -0.163        |
| mol36_4ome       | 0.954                               | 1.004                    |                                          |               | 1.270                    | -0.176        |
| mol36_4nh2       | 0.931                               | 1.011                    |                                          |               | 1.282                    | -0.233        |
| mol39_2nh2       | 0.799                               | 0.819                    |                                          |               | 1.120                    | -0.205        |
| mol39_2oh        | 0.939                               | 0.975                    |                                          |               | 1.200                    | -0.177        |
| mol39_4nh2       | 1.099                               | 1.133                    |                                          |               | 1.520                    | 0.078         |
| mol39_4oh        | 0.531                               | 0.587                    |                                          |               | 0.771                    | -0.105        |
| mol50_2nh2_pent  | 0.619                               | 0.669                    |                                          |               | 0.908                    | 0.908         |
| mol50_2oh_benz   | 0.518                               | 0.563                    |                                          |               | 0.654                    | -0.009        |
| mol50_2oh_pent   | 0.609                               | 0.651                    |                                          |               | 0.935                    | 0.935         |
| mol50_4nh2_benz  | 0.521                               | 0.590                    |                                          |               | 0.744                    | -0.111        |
| mol50_4oh_benz   | 0.522                               | 0.563                    |                                          |               | 0.676                    | -0.121        |
| mol117_2cn       | -0.116                              | -0.126                   |                                          |               | -0.055                   | -0.055        |
| mol117_2nh2      | -0.150                              | -0.166                   |                                          |               | -0.095                   | -0.095        |
| mol117_2oh_benz  | -0.099                              | -0.109                   |                                          |               | -0.032                   | -0.032        |
| mol117_2oh       | -0.153                              | -0.166                   | -0.085                                   | -0.085        | -0.099                   | -0.099        |
| mol117_2ome      | -0.118                              | -0.129                   |                                          |               | -0.046                   | -0.046        |
| mol117_4oh_1     | -0.170                              | -0.151                   |                                          |               | -0.041                   | -0.041        |
| mol117_4oh_2     | 0.139                               | 0.145                    |                                          |               | 0.313                    | 0.313         |
| mol158_2nh2      | 0.905                               | 0.983                    |                                          |               | 1.440                    | 1.440         |
| mol184_4cn       | 0.592                               | 0.641                    |                                          |               | 1.092                    | 1.092         |

**Table S4: Oscillator strengths for select avoided symmetry molecules computed using Tamm-Dancoff approximated time-dependent density functional theory at the  $\omega$ B97X-D/def2-TZVP level. Energies are given in eV.**

| Name       | $E(S_1)$ | $E(T_1)$ | $f(S_1)$ |
|------------|----------|----------|----------|
| mol1_d2h   | 0.390    | 0.153    | 0.0000   |
| mol3_d2    | 0.568    | 0.370    | 0.0000   |
| mol3_d2h   | 0.448    | 0.253    | 0.0000   |
| mol7_d2h   | 1.040    | 0.770    | 0.0000   |
| mol13_c2v  | 1.388    | 1.006    | 0.0078   |
| mol18_d2h  | 1.027    | 0.525    | 0.0000   |
| mol21_c2h  | 1.265    | 0.754    | 0.0065   |
| mol23_d2h  | 1.305    | 0.873    | 0.0010   |
| mol24_c2v  | 1.581    | 0.911    | 0.0120   |
| mol24_d3h  | -0.241   | -0.516   | 0.0003   |
| mol25_c2v  | 0.225    | 0.011    | 0.0001   |
| mol25_cs   | 1.210    | 0.976    | 0.0000   |
| mol35_c2v  | 1.186    | 0.832    | 0.0043   |
| mol36_c2   | 0.415    | -0.051   | 0.0008   |
| mol36_c2v  | 0.399    | -0.082   | 0.0007   |
| mol39_d2h  | 1.434    | 0.403    | 0.0000   |
| mol45_c2v  | 0.404    | 0.036    | 0.0006   |
| mol50_c2h  | 1.339    | 0.181    | 0.0397   |
| mol50_c2v  | 1.023    | 0.114    | 0.0000   |
| mol50_d2h  | 0.684    | -0.468   | 0.0000   |
| mol80_c2v  | 2.506    | 1.933    | 0.0454   |
| mol117_c2v | 1.086    | 0.845    | 0.0012   |
| mol158_c2  | 0.621    | 0.461    | 0.0022   |
| mol158_c2v | 0.473    | 0.299    | 0.0020   |
| mol162_c2  | 0.410    | 0.124    | 0.0014   |
| mol162_c2v | 0.269    | -0.021   | 0.0011   |
| mol185_c2h | 0.628    | 0.312    | 0.0040   |
| mol185_cs  | 1.507    | 0.935    | 0.0041   |
| mol188_c2  | 1.029    | 0.624    | 0.0238   |
| mol188_c2v | 0.714    | 0.311    | 0.0192   |

Table S5: Oscillator strengths for select substituted molecules computed using Tamm-Dancoff approximated time-dependent density functional theory at the  $\omega$ B97X-D/def2-TZVP level. Energies are given in eV.

| Name             | $E(S_1)$ | $E(T_1)$ | $f(S_1)$ |
|------------------|----------|----------|----------|
| mol1_1n_2nh2     | 2.324    | 1.995    | 0.0061   |
| mol1_1n_2nme     | 2.549    | 2.219    | 0.0067   |
| mol1_1n_2nme_tbu | 2.452    | 2.088    | 0.0076   |
| mol1_2n          | 2.331    | 1.637    | 0.0000   |
| mol1_2n_2nh2     | 2.763    | 2.248    | 0.0007   |
| mol1_2n_2nme     | 2.992    | 2.457    | 0.0002   |
| mol1_2n_4nh2     | 3.223    | 1.835    | 0.0000   |
| mol1_2n_4nme2    | 3.083    | 1.592    | 0.0000   |
| mol1_2nh         | 4.340    | 2.154    | 0.2936   |
| mol1_2nh2_1      | 1.759    | 1.481    | 0.0000   |
| mol1_2nh2_2      | 1.763    | 0.953    | 0.0000   |
| mol1_2nme2       | 1.892    | 1.625    | 0.0001   |
| mol1_2oh_1       | 1.778    | 1.261    | 0.0023   |
| mol1_2oh_2       | 1.972    | 1.065    | 0.0000   |
| mol1_2ome        | 1.734    | 1.266    | 0.0030   |
| mol1_4me         | 2.134    | 1.341    | 0.0000   |
| mol1_4nh2        | 2.221    | 1.789    | 0.0000   |
| mol1_4oh_1       | 2.036    | 1.806    | 0.0003   |
| mol1_4oh_lalt    | 2.207    | 1.905    | 0.0000   |
| mol1_4ome        | 1.903    | 1.672    | 0.0009   |
| mol7_2nh2_1      | 1.846    | 1.604    | 0.0000   |
| mol7_2nme2_1     | 1.988    | 1.765    | 0.0000   |
| mol7_2oh_1       | 1.575    | 1.340    | 0.0001   |
| mol7_2oh_2       | 1.661    | 0.980    | 0.0001   |
| mol7_2oh_3       | 1.734    | 1.040    | 0.0003   |
| mol7_2ome        | 1.642    | 1.413    | 0.0004   |
| mol7_2p          | 1.498    | 1.146    | 0.0000   |
| mol7_2p2cl       | 3.477    | 2.958    | 0.0000   |
| mol7_2p2ome      | 4.161    | 3.492    | 0.0032   |
| mol7_4nh2        | 2.270    | 0.667    | 0.0000   |
| mol7_4oh         | 2.098    | 0.762    | 0.0000   |
| mol7_4ome        | 2.137    | 0.962    | 0.0000   |
| mol18_4cn_center | 1.561    | 0.881    | 0.0000   |
| mol18_4nh2_out   | 1.938    | 0.846    | 0.0000   |
| mol25_2nh2_1     | 2.064    | 1.438    | 0.0104   |
| mol25_2nh2_2     | 1.638    | 1.030    | 0.0065   |
| mol25_2oh_1      | 1.969    | 1.499    | 0.0053   |
| mol36_2nh2_2me   | 1.576    | 0.274    | 0.0071   |
| mol36_2nme       | 1.359    | -0.059   | 0.0051   |
| mol36_2nme_2me   | 1.467    | 0.143    | 0.0025   |
| mol36_2ome       | 1.487    | 0.274    | 0.0136   |
| mol36_4nh2       | 1.854    | 0.302    | 0.1546   |
| mol36_4oh        | 1.565    | 0.125    | 0.0501   |
| mol36_4ome       | 1.567    | 0.078    | 0.0680   |
| mol39_2nh2       | 2.187    | 0.814    | 0.0000   |
| mol39_2oh        | 1.953    | 0.524    | 0.0026   |
| mol39_4nh2       | 1.868    | 0.198    | 0.0000   |
| mol39_4oh        | 2.249    | 1.264    | 0.0029   |
| mol50_2oh_benz   | 1.546    | 0.671    | 0.0098   |
| mol50_4nh2_benz  | 2.360    | 1.411    | 0.0000   |
| mol50_4oh_benz   | 2.040    | 1.155    | 0.0000   |
| mol117_2cn       | 1.175    | 0.970    | 0.0001   |
| mol117_2nh2      | 1.656    | 1.471    | 0.0000   |
| mol117_2oh       | 1.502    | 1.320    | 0.0000   |
| mol117_2oh_benz  | 1.123    | 0.887    | 0.0018   |
| mol117_2ome      | 1.525    | 1.332    | 0.0003   |
| mol117_4oh_1     | 1.936    | 1.751    | 0.0021   |
| mol117_4oh_2     | 1.211    | 0.798    | 0.0058   |



## References

- (1) Terence Blaskovits, J.; Garner, M. H.; Corminboeuf, C. Symmetry-Induced Singlet-Triplet Inversions in Non-Alternant Hydrocarbons\*\*. *Angew. Chem. Int. Ed.* **2023**, *62*, e202218156.
- (2) Toyota, A.; Nakajima, T. *J. Chem. Soc., Perkin Trans. 2* **1986**, 1731–1734.
- (3) Yoneda, S.; Shibata, M.; Kida, S.; Yoshida, Z.-i.; Kai, Y.; Miki, K.; Kasai, N. A Novel Aromatic Hydrocarbon with 16-Electron Periphery: “Cyclic Bicalicene”. *Angew. Chem. Int. Ed. Engl.* **1984**, *23*, 63–64.
- (4) Lee, C.; Yang, W.; Parr, R. G. Development of the Colle-Salvetti correlation-energy formula into a functional of the electron density. *Phys. Rev. B* **1988**, *37*, 785.
- (5) Becke, A. D. Density-functional thermochemistry. III. The role of exact exchange. *J. Chem. Phys.* **1993**, *98*, 5648–5652.
- (6) Corminboeuf, C.; Heine, T.; Seifert, G.; von Ragué Schleyer, P.; Weber, J. Induced magnetic fields in aromatic [n]-annulenes—interpretation of NICS tensor components. *Phys. Chem. Chem. Phys.* **2004**, *6*, 273–276.
- (7) Ditchfield, R. Self-consistent perturbation theory of diamagnetism: I. A gauge-invariant LCAO method for NMR chemical shifts. *Mol. Phys.* **1974**, *27*, 789–807.
- (8) Wolinski, K.; Hinton, J. F.; Pulay, P. Efficient implementation of the gauge-independent atomic orbital method for NMR chemical shift calculations. *J. Am. Chem. Soc.* **1990**, *112*, 8251–8260.
- (9) Wheeler, S. E.; Houk, K. N.; Schleyer, P. v. R.; Allen, W. D. A Hierarchy of Homodesmotic Reactions for Thermochemistry. *J. Am. Chem. Soc.* **2009**, *131*, 2547–2560.
